# Supplementary material for: Antibody Response after Homologous and Heterologous Prime–Boost COVID-19 Vaccination in a Bangladeshi Residential University Cohort
Source: MDPI journal article supplement (doi:10.3390/vaccines12050482), 2024-04-30
Supplement: s1 [file s1]

Supplementary table: ROSES-I statement checklist

| Item                         | Item Number | ROSES-I items                                                                                                                                                                                                                                                                                 | Checkbox                            | Comments                                                   |
|------------------------------|-------------|-----------------------------------------------------------------------------------------------------------------------------------------------------------------------------------------------------------------------------------------------------------------------------------------------|-------------------------------------|------------------------------------------------------------|
| Title and abstract           | 1           | ROSES-I 1.1: The term “seroepidemiologic,” “seroepidemiology,” “seroprevalence,” or “seroincidence” should be applied to the study in the title or abstract, and the medical subject heading “Seroepidemiologic Studies” be used when the report is of a population-based serological survey. | <input checked="" type="checkbox"/> | Abstract                                                   |
| Introduction                 | 2           | ROSES-I 2.1: State what is known about the kinetics of antibody rise, decay, and persistence following infection for the particular virus being studied and the justification for threshold antibody titers or changes in titers used to define evidence of infection.                        | <input type="checkbox"/>            | Not provided                                               |
|                              |             | ROSES-I 2.2: State what is known about the sensitivity and specificity of the antibody detection assay being used.                                                                                                                                                                            | <input type="checkbox"/>            | Not provided                                               |
|                              | 3           | ROSES-I 3.1: State the specific measure of occurrence that is being estimated, for example, point seroprevalence, cumulative incidence of infection, secondary infection risk.                                                                                                                | <input checked="" type="checkbox"/> | Somewhat though in case of vaccination not antibody titre. |
| <b>Epidemiologic methods</b> |             |                                                                                                                                                                                                                                                                                               |                                     |                                                            |
| Study design                 | 4           | ROSES-I 4.1: State which specific seroepidemiologic study design was chosen and why.                                                                                                                                                                                                          | <input checked="" type="checkbox"/> | Has been mentioned in Section 2.2.                         |

|              |   |                                                                                                                                                                                                                                                                                                  |                                     |                                                                                                                    |
|--------------|---|--------------------------------------------------------------------------------------------------------------------------------------------------------------------------------------------------------------------------------------------------------------------------------------------------|-------------------------------------|--------------------------------------------------------------------------------------------------------------------|
| Setting      | 5 | ROSES-I 5.1: Describe the timing of the biological sampling in relation to the disease epidemiology in the study population (the beginning, peak, and end of virus transmission).                                                                                                                | <input type="checkbox"/>            | Not applicable.                                                                                                    |
|              |   | ROSES-I 5.2: Where known, describe the timing of biological sampling in individuals in relation to disease onset and to exposures of interest.                                                                                                                                                   | <input type="checkbox"/>            | Not applicable                                                                                                     |
|              |   | ROSES-I 5.3: State the interval between sequential biological samples (serial cross-sectional or longitudinal studies), or specify whether only a single sample was collected (cross-sectional study).                                                                                           | <input checked="" type="checkbox"/> | Only one sample was collected. Has been mentioned in Section 2.2.                                                  |
| Participants | 6 | ROSES-I 6.1: For case-ascertained transmission studies, describe the method of case ascertainment and criteria for defining a “case”.                                                                                                                                                            | <input type="checkbox"/>            | Not applicable                                                                                                     |
|              |   | ROSES-I 6.2: For household-or institution-based transmission studies, describe the definition of a household or the institution.                                                                                                                                                                 | <input type="checkbox"/>            | Not applicable                                                                                                     |
|              |   | ROSES-I 6.3: For outbreak investigations involving serologic sampling, describe the setting in which the cases were identified, for example, village/ residential setting, occupational workplace.                                                                                               | <input type="checkbox"/>            | Not applicable. Vaccination study was carried out within the occupational workplace, i.e. Jahangirnagar University |
|              |   | ROSES-I 6.4: To aid the interpretation of seroepidemiologic studies of novel influenza A virus subtypes, the results from exposed populations should be compared with the results from unexposed populations. Efforts to validate the assay in virologically confirmed cases should be reported. | <input type="checkbox"/>            | Not applicable                                                                                                     |

|                                  |    |                                                                                                                                                                                                                         |                                     |                     |
|----------------------------------|----|-------------------------------------------------------------------------------------------------------------------------------------------------------------------------------------------------------------------------|-------------------------------------|---------------------|
| Variables                        | 7  | ROSES-I 7.1 The median age and range for each exposure group should be reported.                                                                                                                                        | <input checked="" type="checkbox"/> | Section: Table-1    |
|                                  |    | ROSES-I 7.2: Describe the potential for immunization (specify vaccine and timing of vaccination in relationship to collection of serum), if applicable, to affect the outcome measures.                                 | <input checked="" type="checkbox"/> | Section: Table-1    |
|                                  |    | ROSES-I 7.3: Describe any known or potential immunological cross-reactivity that may bias the outcome measures.                                                                                                         | <input checked="" type="checkbox"/> | Section: Discussion |
|                                  |    | ROSES-I 7.4: Describe illness definitions and methods for ascertaining the presence or absence of clinical illness in subjects.                                                                                         | <input type="checkbox"/>            | Not defined         |
| Data sources/ measurement biases | 8a | ROSES-I 8.1: If relevant, describe measures taken to identify and record immunization history.                                                                                                                          | <input checked="" type="checkbox"/> | Section: 2.2        |
| Bias                             | 9  | ROSES-I 9.1: If relevant, describe efforts to control for the potential effect of immunization on estimates of outcomes.                                                                                                | <input type="checkbox"/>            | Not provided.       |
| Study size                       | 10 | ROSES-I 10.1: Describe the baseline estimated seroprevalence at given antibody titers or incidence of infection and cite published literature to support these estimates.                                               | <input checked="" type="checkbox"/> | Section: 2.2, 3.3   |
| Quantitative variables           | 11 | ROSES-I 11.1: Describe the serological assay's limit of detection and how this limit is defined or calculated. Describe how samples with a result below or on the borderline of the limit were handled in the analysis. | <input checked="" type="checkbox"/> | Section: Discussion |

|                                    |    |                                                                                                                                                                                                                                                                                                                                                                                                                            |                                     |                                                                                                             |
|------------------------------------|----|----------------------------------------------------------------------------------------------------------------------------------------------------------------------------------------------------------------------------------------------------------------------------------------------------------------------------------------------------------------------------------------------------------------------------|-------------------------------------|-------------------------------------------------------------------------------------------------------------|
|                                    |    | ROSES-I 11.2: Describe and justify the titer or other result used to define “seropositivity,” or the antibody titer change or change in other assay result used to define “seroconversion.” Avoid the term “seroconversion” unless referring to change from undetectable to detectable antibody level. Otherwise report the fold-rise in titer. Avoid the term “infection” but report “seroprevalence at a titer of ....”. | <input checked="" type="checkbox"/> | Section: Results                                                                                            |
|                                    |    | ROSES-I 11.3: If statements or inferences are made about protection from infection, describe what is known about the correlation between the assay results and protection from infection and illness.                                                                                                                                                                                                                      | <input type="checkbox"/>            | Not applicable. Our study do not comment on protection from infection but only look at the anitbody levels. |
| Statistical methods                | 12 | ROSES-I 12.1: if relevant, state how the non-independence of data was managed.                                                                                                                                                                                                                                                                                                                                             | <input type="checkbox"/>            | Not applicable.                                                                                             |
|                                    |    | ROSES-I 12.2: if relevant, report methods used to account for the probability of seropositivity or seroconversion if infected, and to account for decay in antibody titers over time.                                                                                                                                                                                                                                      | <input checked="" type="checkbox"/> | Section: Materials and methods                                                                              |
| <b>Laboratory methods      12a</b> |    |                                                                                                                                                                                                                                                                                                                                                                                                                            |                                     |                                                                                                             |
| Sample type and handling           |    | ROSES-I 12a.1: Describe the sample type—serum or plasma. If plasma is used, specify the anticoagulant used (heparin, sodium citrate, EDTA, etc.).                                                                                                                                                                                                                                                                          | <input checked="" type="checkbox"/> | Section: 2.2                                                                                                |
| Serological assays                 |    | ROSES-I 12a.2: Describe the specimen storage conditions (4°C, –20 °C, –80 °C). If frozen prior to the analysis, describe the time to freezing and the number of freeze/thaw cycles prior to testing.                                                                                                                                                                                                                       | <input checked="" type="checkbox"/> | Section: 2.2                                                                                                |
|                                    |    | ROSES-I 12a.3: Specify the assay type (e.g., hemagglutination inhibition; virus neutralization/microneutralization; ELISA; other) and methods used to determine the endpoint titer.                                                                                                                                                                                                                                        | <input checked="" type="checkbox"/> | Section: 2.3                                                                                                |

|                                                                                                                                                                                                                                                                                    |                                     |                 |
|------------------------------------------------------------------------------------------------------------------------------------------------------------------------------------------------------------------------------------------------------------------------------------|-------------------------------------|-----------------|
| ROSES-I 12a.4: Reference a previously published, CONSIDE consensus serologic assay or WHO protocol if used, and any modifications of the protocol. If a previously published protocol is not used, provide full details in supplementary materials.                                | <input type="checkbox"/>            | Not applicable. |
| ROSES-I 12a.5: State what is known about the determinants of the variability of the antibody detection assay being used.                                                                                                                                                           | <input type="checkbox"/>            | Not provided.   |
| ROSES-I 12a.6: Specify the antigen(s) used in the assay, including virus strain name, subtype, lineage or clade, with standardized nomenclature and reference; specify whether live virus or inactivated virus was used (where applicable).                                        | <input checked="" type="checkbox"/> | Section: 2.3    |
| ROSES-I 12a.7: Report if antigen(s) from potentially cross-reactive pathogens/strains were used in order to identify cross-reactivity, and specify which antigen was used, including virus name, subtype, strain, lineage and clade, with standardized nomenclature and reference. | <input type="checkbox"/>            | Not applicable. |
| ROSES-I 12a.8: If red blood cells were used for a hemagglutinin inhibition assay, specify the animal species from which they were obtained and concentration (v/v) used.                                                                                                           | <input type="checkbox"/>            | Not applicable. |
| ROSES-I 12a.9: Describe positive and negative controls used.                                                                                                                                                                                                                       | <input type="checkbox"/>            | Section: 2.3    |
| ROSES-I 12a.10: Describe starting and end dilutions.                                                                                                                                                                                                                               | <input type="checkbox"/>            | Section: 2.3    |

|                  |     |                                                                                                                                                                                                                        |                                     |                                                                                   |
|------------------|-----|------------------------------------------------------------------------------------------------------------------------------------------------------------------------------------------------------------------------|-------------------------------------|-----------------------------------------------------------------------------------|
|                  |     | ROSES-I 12a.11: Specify laboratory biosafety conditions.                                                                                                                                                               | <input type="checkbox"/>            | Not provided. The ELISA test was carried out for determination of antibody titer. |
|                  |     | ROSES-I 12a.12: Specify whether replication was performed, and if so, the acceptable replication parameters.                                                                                                           | <input type="checkbox"/>            | Not provided. However, for each ELISA sample a replication of 3 was carried out.  |
|                  |     | ROSES-I 12a.13: Specify whether a confirmatory assay was performed and all specifics of this assay, at the same level of detail.                                                                                       | <input type="checkbox"/>            | Not applicable.                                                                   |
|                  |     | ROSES-I 12a.14: Specify international standards used, if appropriate.                                                                                                                                                  | <input type="checkbox"/>            | Not provided.                                                                     |
| <b>Results</b>   |     |                                                                                                                                                                                                                        |                                     |                                                                                   |
| Participants     | 13a | ROSES-I 13a.1: Report the numbers of individuals at each stage of the study—the numbers potentially eligible, examined for eligibility, confirmed eligible, included in the study, completing follow-up, and analyzed. | <input checked="" type="checkbox"/> | Section: 3.1                                                                      |
|                  |     | ROSES-I 13a.2: Give reasons for non-participation at each stage.                                                                                                                                                       | <input type="checkbox"/>            | Not provided.                                                                     |
|                  |     | ROSES-I 13a.3: Consider use of a flow diagram                                                                                                                                                                          | <input type="checkbox"/>            | Not provided.                                                                     |
| Descriptive data | 14a | ROSES-I 14a.1: Give characteristics of study participants (e.g., demographic, clinical, social) and information on exposures and potential risk factors.                                                               | <input checked="" type="checkbox"/> | Section: 3.1                                                                      |
|                  |     | ROSES-I 14a.2: Indicate the number of participants with missing data for each variable of interest.                                                                                                                    | <input checked="" type="checkbox"/> | Section 3.1                                                                       |

|                   |     |                                                                                                                                                                                                                                                                                       |                                     |                                  |
|-------------------|-----|---------------------------------------------------------------------------------------------------------------------------------------------------------------------------------------------------------------------------------------------------------------------------------------|-------------------------------------|----------------------------------|
|                   |     | ROSES-I 14a.3: Cohort study—summarize follow-up time (e.g., average and total amount).                                                                                                                                                                                                | <input type="checkbox"/>            | Not applicable.                  |
| Outcome data      | 15a | ROSES-I 15a.1: Cohort study—report the numbers of outcome events or summary measures over time<br>Case-control study—report the numbers in each exposure category, or summary measures of exposure<br>Cross-sectional study—report the numbers of outcome events or summary measures. | <input checked="" type="checkbox"/> | Section: 3                       |
| Main results      | 16  | ROSES-I 16.1: Report unadjusted estimates of distribution of titers by age group.                                                                                                                                                                                                     | <input checked="" type="checkbox"/> | Section: 3.9                     |
|                   |     | ROSES-I 16.2: Report methods to standardize the results from the study sample to the target population.                                                                                                                                                                               | <input checked="" type="checkbox"/> | Section: 3                       |
| Other analyses    | 17  | ROSES-I 17.1: Report other analyses performed—analyses of subgroups and interactions, and sensitivity analyses.                                                                                                                                                                       | <input checked="" type="checkbox"/> | Section: 3.3, 3.4, 3.5, 3.6, 3.7 |
| <b>Discussion</b> |     |                                                                                                                                                                                                                                                                                       |                                     |                                  |
| Key results       | 18  | ROSES-I 18.1: Summarize key results with reference to study objectives.                                                                                                                                                                                                               | <input checked="" type="checkbox"/> |                                  |
| Limitations       | 19  | ROSES-I 19.1 Discuss limitations and strengths of the study with reference to Table 1.                                                                                                                                                                                                | <input checked="" type="checkbox"/> |                                  |
| Interpretation    | 20  | ROSES-I 20.1: Discuss the interpretation of the results in the context of known or potential cross-reactivity.                                                                                                                                                                        | <input type="checkbox"/>            | Not provided.                    |

|                          |    |                                                                                                                                                                     |                                     |                                       |
|--------------------------|----|---------------------------------------------------------------------------------------------------------------------------------------------------------------------|-------------------------------------|---------------------------------------|
| Generalizability         | 21 | ROSES-I 21.1: Discuss the generalizability (external validity) of the study results.                                                                                | <input checked="" type="checkbox"/> |                                       |
| <b>Other information</b> |    |                                                                                                                                                                     |                                     |                                       |
| Funding                  | 22 | ROSES-I 22.1: Specify if institutional review board approval was received; if not, specify reason (e.g., public health outbreak response/non-research designation). | <input checked="" type="checkbox"/> | No funding was used for the research. |
